# Supplementary material for: Gestational Exposure to Organophosphate Pesticides and Longitudinally Assessed Behaviors Related to Attention-Deficit/Hyperactivity Disorder and Executive Function
Source: PubMed Central journal article supplement — Am J Epidemiol. 2021 Jun 8;190(11):2420–31. doi: 10.1093/aje/kwab173 (PMC8757311; doi:10.1093/aje/kwab173), 2021-06-08
Supplement: Web_Material_kwab173.pdf [file Web_Material_kwab173.pdf]

## WEB MATERIAL

### **Gestational Exposure to Organophosphate Pesticides and Longitudinally Assessed**

### **Behaviors Related to Attention-Deficit/Hyperactivity Disorder and Executive Function**

Sharon K. Sagiv, Katherine Kogut, Kim Harley, Asa Bradman, Norma Morga, and Brenda Eskenazi

Address correspondence to: Dr. Sharon K. Sagiv, Center for Environmental Research and Children's Health (CERCH), School of Public Health, University of California, Berkeley, 1995 University Avenue, Suite 265, Berkeley, CA 94720 (telephone: 919-260-6339; e-mail: [sagiv@berkeley.edu](mailto:sagiv@berkeley.edu)).

| <u>Contents</u>                                                                                                                                                                                                                                                                                                                                 | <u>Page</u> |
|-------------------------------------------------------------------------------------------------------------------------------------------------------------------------------------------------------------------------------------------------------------------------------------------------------------------------------------------------|-------------|
| Web Appendix 1. Exclusions Based on Developmental Disorders.....                                                                                                                                                                                                                                                                                | 3           |
| Web Appendix 2. Neurodevelopmental Assessments.....                                                                                                                                                                                                                                                                                             | 3           |
| Web Table 1. Demographic and Exposure Characteristics of All Children with Prenatal DAP Measurements and of Children Included by Timepoint, with Assessment for Differences Between Included and Excluded Children: CHAMACOS Study.....                                                                                                         | 7           |
| Web Table 2. Mean attention and executive function scores by age point, based on teacher report, maternal report, and child assessment: CHAMACOS study.....                                                                                                                                                                                     | 10          |
| Web Table 3. Spearman Correlation of Select Measures within Timepoints: CHAMACOS Study.....                                                                                                                                                                                                                                                     | 12          |
| Web Table 4. Spearman Correlation of Repeated Measures across Timepoints: CHAMACOS Study.....                                                                                                                                                                                                                                                   | 13          |
| Web Table 5. Supplemental Table 5: Spearman Correlation Matrix of Measures, with Repeated Measures Represented as the Mean Score for that Child Across Age Points: CHAMACOS Study.....                                                                                                                                                          | 14          |
| Web Table 6. Change in maternal report and child-assessed attention and executive function scores per 10-fold increases in mean total prenatal urinary DM concentrations (nmol/L) using repeated measures (GEE) models, overall and stratified by sex, in the CHAMACOS study population, enrolled 1999-2000 in Salinas Valley, California. .... | 15          |
| Web Table 7. Change in maternal report and child-assessed attention and executive function scores per 10-fold increases in mean total prenatal urinary DE concentrations (nmol/L) using                                                                                                                                                         |             |

## WEB MATERIAL

repeated measures (GEE) models, overall and stratified by sex, in the CHAMACOS study population, enrolled 1999-2000 in Salinas Valley, California..... 17

Web Table 8. Adjusted regression coefficients and 95% confidence intervals for multivariable linear regression models of association between mean total prenatal urinary DAP concentrations (nmol/L, log10 scale) and children's attention and executive function as reflected by teacher report, maternal report, and child assessment scores by time point per 10-fold increases in mean total prenatal urinary DAP concentrations (nmol/L), in the CHAMACOS study population, enrolled 1999-2000 in Salinas Valley, California..... 19

Web Figure 1. Directed acyclic graph (DAG) for associations of prenatal organophosphate exposure and executive function and attention-deficit/hyperactivity disorder-related behaviors..... 21

References..... 22

## **WEB MATERIAL**

### **Web Appendix 1. Exclusions Based on Developmental Disorders**

We excluded 6 children with diagnosed developmental conditions who could not complete all testing. These include 1 child with Down's Syndrome, 1 with CP/Hydrocephalus, 3 children with an ASD diagnosis, and 1 deaf child. Aside from incomplete testing for these 6 children, their cognitive and behavioral differences from other children in the cohort would be significant for reasons beyond early pesticide exposure.

### **Web Appendix 2. Neurodevelopmental Assessments**

Although we assessed multiple aspects of children's cognitive and behavioral development during this time period, we selected several informant-report scales and child assessment measures with the explicit intention to characterize children's executive functioning and ADHD-related behaviors as discreet (and separate) domains. A priori, we selected the Behavior Rating Inventory of Executive Function<sup>1</sup> and the Wisconsin Card Sort Task<sup>5</sup> as our key measures of executive functions and the Conners' ADHD/DSM-IV Scales<sup>2</sup> and the Conners' Continuous Performance Test<sup>6</sup> as our key measures of attention. We also incorporated subscales from two other instruments we had administered as part of our overall assessment battery. The first were the Hyperactivity and Attention Problems scales of the Behavior Assessment Scales for Children<sup>3</sup>. In addition to the value of having another parent and teacher reported scale for ADHD-related behaviors in the BASC-2, we also administered the child BASC-2 self-report at age 10½, which offered a unique opportunity to consider how children's own perspective on their hyperactivity or attention problems compared to assessments from their teachers or parents as well as their own measured performance on tasks of attention. The second instrument from

## WEB MATERIAL

which we mined additional data was the Wechsler Intelligence Scale for Children<sup>4</sup> (see below for details).

The child behavior scales we administered are follows:

Behavior Rating Inventory of Executive Function (BRIEF)<sup>1</sup>: At child ages 7, 9 and 12, parents completed the BRIEF, and at age 7, the child's teacher completed a BRIEF. We examined the Behavioral Regulation Index (concerning children's ability to inhibit inappropriate behavior; to shift easily between situations; or to control emotional reactions), the Metacognition Index (concerning their ability to initiate projects or play; to exhibit adequate working memory in their daily lives; to plan and organize their activities; to organize and keep track of their belongings; and to monitor both the quality of their work and the impact of their behavior on those around them), and the Global Executive Composite, which is the overarching summary score. Scores are age- and sex-standardized (T-scores; M=50, SD=10).

Conners' ADHD/DSM-IV Scales, Parent Version (CADS-P) and Teacher Version (CADS-T)<sup>2</sup>: At child ages 7, 9 and 12, parents completed the CADS-P, yielding four subscales: the Conners' ADHD index score, designed to identify children "at risk" for ADHD; and the DSM-IV-based Inattentive, Hyperactive/Impulsive, and Total subscales. Teachers completed the CADS-T when the child was age 7 years. All CADS data are age- and sex-standardized (T-scores; M=50, SD=10).

Behavior Assessment System for Children, 2<sup>nd</sup> edition Parent and Teacher Report (BASC-2) and Self Report of Personality (SRP)<sup>3</sup>: When the child was 7, parents and teachers completed the BASC-2. When the child was 10½, parents completed the BASC-2 and children completed specific scales of the parallel SRP. We examined the Hyperactivity and Attention Problems scales from these tests, both of which are age- and sex-standardized (T-scores; M=50, SD=10).

## WEB MATERIAL

Due to the low literacy levels of mothers in CHAMACOS, maternal report scales were administered aloud by bilingual, bicultural study interviewers in the mother's language of choice. Teachers (at 7 years) completed paper versions of the child behavior scales in English, and children (at 10.5 years) completed a computerized version of the SRP in their primary language.

With regards to the direct neuropsychological assessments, we note that our psychometricians assessed children in their dominant language at ages 7 through 10½ years, as ascertained via direct assessment with the oral vocabulary subtest of the Woodcock–Johnson/Woodcock–Muñoz Tests of Cognitive Ability in both English and Spanish.<sup>18</sup> Because nearly all children transitioned to English dominance during this period, all children were assessed in English at the age 12-year visit. The neuropsychological assessments we have used in this analysis are as follows:

Wechsler Intelligence Scale for Children - Fourth Edition (WISC-IV)<sup>4</sup>: At ages 7 and 10½, children were administered the WISC-IV. We examined the Processing Speed and Working Memory subscale scores (M=100; SD=15) as indicators of attention and executive function, respectively. Processing Speed scores were based on children's performance on two tasks – Coding and Symbol Search – both of which require rapid visual scanning of novel symbols and providing a quick and accurate response in accordance with task rules. While many skills, including visual perception and hand-eye coordination, are needed to complete these tasks well, the ability to attend to the visual materials and screen out distractions are critical components of good performance on these tasks. Working Memory scores were based on children's performance on two other tasks – Digit Span and Letter-Number Sequence – in which the children heard strings of numbers and/or letters read aloud by the tester, were required to reorder them mentally in accordance with task rules, and then verbally provided the reordered string of

## WEB MATERIAL

numbers/letters to the tester. While several skills, including attention to verbal input, are needed to complete these tasks well, the ability to hold multiple numbers/letters in mind while also recalling and implementing the re-ordering rules require a high degree of executive functioning to perform well.

Wisconsin Card Sort Task-64: Computer Version 2- Research Edition (WCST)<sup>5</sup>: At ages 9 and 12, children completed this computerized task of set-shifting, which measures skills around strategic planning, ability to shift cognitive strategies, and impulse control. We examined T-scores for errors and perseverative errors.

Conners' Continuous Performance Test (CPT II)<sup>6</sup>: At ages 9 and 12, children completed this computerized vigilance task that assesses hit rate, accuracy, and impulse control (T-scores; M=50, SD=10). We examined continuous T-scores (standardized to a non-clinical population) for errors of commission (false positives), errors of omission (non-response), and hit rate standard error overall, and by block and interstimulus interval. Higher variability in hit rate indicates performance inconsistency, a symptom of ADHD.<sup>7</sup> We also examined the continuous ADHD Confidence Index score, which indicates the probability that children are correctly classified as having clinical ADHD (note that this not equivalent to a clinical diagnosis of ADHD).

## WEB MATERIAL

**Web Table 1.** Demographic and Exposure Characteristics of All Children with Prenatal DAP Measurements and of Children Included by Timepoint, with Assessment for Differences Between Included and Excluded Children: CHAMACOS Study.

|                                               | <b>All Children with<br/>Prenatal DAPs</b> | <b>Any 7y<br/>Outcomes</b> | <i>p</i> <sup>e</sup> | <b>7y Teacher<br/>Report</b> | <i>p</i> <sup>e</sup> | <b>Any 9y<br/>Outcomes</b> | <i>p</i> <sup>e</sup> | <b>Any 10.5y<br/>Outcomes</b> | <i>p</i> <sup>e</sup> | <b>Any 12y<br/>Outcomes</b> | <i>p</i> <sup>e</sup> |
|-----------------------------------------------|--------------------------------------------|----------------------------|-----------------------|------------------------------|-----------------------|----------------------------|-----------------------|-------------------------------|-----------------------|-----------------------------|-----------------------|
|                                               | <b>(n=534)</b>                             | <b>(n=341)</b>             |                       | <b>(n=277)</b>               |                       | <b>(n=325)</b>             |                       | <b>(n=310)</b>                |                       | <b>(n=332)</b>              |                       |
|                                               | <b>n (%)<sup>b</sup></b>                   | <b>n (%)<sup>b</sup></b>   |                       | <b>n (%)<sup>b</sup></b>     |                       | <b>n (%)<sup>b</sup></b>   |                       | <b>n (%)<sup>b</sup></b>      |                       | <b>n (%)<sup>b</sup></b>    |                       |
| <b>Child sex</b>                              |                                            |                            |                       |                              |                       |                            |                       |                               |                       |                             |                       |
| Male                                          | 264 (49)                                   | 159 (47)                   | 0.08                  | 127 (46)                     | 0.09                  | 155 (48)                   | 0.32                  | 144 (46)                      | 0.10                  | 156 (47)                    | 0.15                  |
| Female                                        | 270 (51)                                   | 182 (53)                   |                       | 150 (54)                     |                       | 170 (52)                   |                       | 166 (54)                      |                       | 176 (53)                    |                       |
| <b>Maternal country of birth</b>              |                                            |                            |                       |                              |                       |                            |                       |                               |                       |                             |                       |
| U.S.                                          | 70 (13)                                    | 41 (12)                    | 0.05                  | 28 (10)                      | <0.01                 | 41 (13)                    | 0.03                  | 39 (13)                       | 0.05                  | 41 (12)                     | 0.08                  |
| Mexico                                        | 452 (85)                                   | 296 (89)                   |                       | 247 (89)                     |                       | 281 (86)                   |                       | 268 (86)                      |                       | 287 (86)                    |                       |
| Other                                         | 12 (2)                                     | 4 (1)                      |                       | 2 (1)                        |                       | 3 (1)                      |                       | 3 (1)                         |                       | 4 (1)                       |                       |
| <b>Maternal years in US at child delivery</b> |                                            |                            |                       |                              |                       |                            |                       |                               |                       |                             |                       |
| ≤1                                            | 129 (24)                                   | 76 (22)                    | 0.07                  | 66 (24)                      | 0.02                  | 68 (21)                    | 0.03                  | 66 (21)                       | 0.10                  | 73 (22)                     | 0.27                  |
| 2-5                                           | 144 (27)                                   | 90 (26)                    |                       | 74 (27)                      |                       | 85 (26)                    |                       | 82 (26)                       |                       | 90 (27)                     |                       |
| 6-10                                          | 116 (22)                                   | 87 (25)                    |                       | 74 (27)                      |                       | 84 (26)                    |                       | 79 (25)                       |                       | 81 (24)                     |                       |
| 11+                                           | 86 (16)                                    | 54 (16)                    |                       | 41 (15)                      |                       | 54 (17)                    |                       | 51 (16)                       |                       | 54 (16)                     |                       |
| Entire Life                                   | 59 (11)                                    | 34 (10)                    |                       | 22 (8)                       |                       | 34 (10)                    |                       | 32 (10)                       |                       | 34 (10)                     |                       |
| <b>Maternal age at child delivery</b>         |                                            |                            |                       |                              |                       |                            |                       |                               |                       |                             |                       |
| 18-24                                         | 248 (46)                                   | 141 (41)                   | 0.01                  | 112 (40)                     | 0.02                  | 130 (40)                   | <0.01                 | 120 (39)                      | <0.01                 | 135 (41)                    | <0.01                 |
| 25-29                                         | 163 (30)                                   | 113 (33)                   |                       | 97 (35)                      |                       | 108 (33)                   |                       | 109 (35)                      |                       | 112 (34)                    |                       |
| 30-34                                         | 82 (15)                                    | 56 (16)                    |                       | 43 (16)                      |                       | 53 (16)                    |                       | 52 (17)                       |                       | 53 (16)                     |                       |
| 35-45                                         | 40 (7)                                     | 31 (9)                     |                       | 25 (9)                       |                       | 34 (11)                    |                       | 29 (9)                        |                       | 32 (10)                     |                       |
| missing                                       | 1 (0)                                      | 0 (0)                      |                       | 0 (0)                        |                       |                            |                       | 0 (0)                         |                       | 0 (0)                       |                       |
| <b>Maternal education at child delivery</b>   |                                            |                            |                       |                              |                       |                            |                       |                               |                       |                             |                       |
| <6th grade                                    | 233 (44)                                   | 157 (46)                   | 0.27                  | 130 (47)                     | 0.22                  | 144 (44)                   | 0.87                  | 134 (43)                      | 0.97                  | 148 (45)                    | 0.81                  |
| 7th-12th grade                                | 192 (36)                                   | 115 (34)                   |                       | 91 (33)                      |                       | 114 (35)                   |                       | 112 (36)                      |                       | 116 (35)                    |                       |

## WEB MATERIAL

|                                                                    |                       |                |                      |                |                      |                |                      |                |                      |                |                      |
|--------------------------------------------------------------------|-----------------------|----------------|----------------------|----------------|----------------------|----------------|----------------------|----------------|----------------------|----------------|----------------------|
| Completed high school                                              | 109 (20)              | 69 (20)        |                      | 56 (20)        |                      | 67 (21)        |                      | 64 (21)        |                      | 68 (20)        |                      |
| Maternal Verbal IQ (PPVT Score at child age 9)                     |                       |                |                      |                |                      |                |                      |                |                      |                |                      |
| ≤74                                                                | 59 (11)               | 58 (17)        | 0.48                 | 47 (17)        | 0.34                 | 59 (19)        | 0.44                 | 58 (19)        | 0.40                 | 58 (17)        | 0.77                 |
| 75-99                                                              | 111 (21)              | 105 (31)       |                      | 83(30)         |                      | 108 (33)       |                      | 104 (34)       |                      | 107 (32)       |                      |
| ≥100                                                               | 147 (28)              | 139 (41)       |                      | 121 (44)       |                      | 143 (44)       |                      | 140 (45)       |                      | 142 (43)       |                      |
| missing                                                            | 217 (41) <sup>g</sup> | 39 (11)        |                      | 26 (9)         |                      | 15 (5)         |                      | 8 (3)          |                      | 25 (8)         |                      |
| Smoked during pregnancy                                            |                       |                |                      |                |                      |                |                      |                |                      |                |                      |
| No                                                                 | 503 (91)              | 328 (96)       | <0.01                | 267 (96)       | 0.02                 | 313 (96)       | <0.01                | 298 (96)       | 0.03                 | 319 (96)       | 0.02                 |
| Yes                                                                | 31 (6)                | 13 (4)         |                      | 10 (4)         |                      | 12 (4)         |                      | 12 (4)         |                      | 13 (4)         |                      |
| Duration of breastfeeding                                          |                       |                |                      |                |                      |                |                      |                |                      |                |                      |
| Never breastfed                                                    | 27 (5)                | 15 (4)         | <0.01                | 12 (4)         | <0.01                | 15 (5)         | <0.01                | 15 (5)         | <0.01                | 16 (5)         | <0.01                |
| ≤1 month                                                           | 107 (20)              | 43 (13)        |                      | 35 (13)        |                      | 41 (13)        |                      | 39 (13)        |                      | 43 (13)        |                      |
| >1-6 months                                                        | 181 (34)              | 115 (34)       |                      | 92 (33)        |                      | 110 (34)       |                      | 105 (34)       |                      | 110 (33)       |                      |
| >6-12 months                                                       | 102 (19)              | 75 (22)        |                      | 64 (23)        |                      | 68 (21)        |                      | 65 (21)        |                      | 71 (21)        |                      |
| >12 months                                                         | 107 (20)              | 93 (27)        |                      | 74 (27)        |                      | 91 (28)        |                      | 86 (27)        |                      | 92 (28)        |                      |
| missing                                                            | 10 (2)                | 0 (0)          |                      | 0 (0)          |                      | 0 (0)          |                      | 0 (0)          |                      | 0 (0)          |                      |
| Mother depressed at 7 and/or 9 year visits                         |                       |                |                      |                |                      |                |                      |                |                      |                |                      |
| No                                                                 | 227 (43)              | 213 (64)       | 0.58                 | 176 (64)       | 0.77                 | 205 (63)       | 0.18                 | 192 (62)       | 0.02                 | 208 (63)       | 0.49                 |
| Yes                                                                | 126 (24)              | 120 (35)       |                      | 96 (35)        |                      | 119 (37)       |                      | 117 (38)       |                      | 118 (36)       |                      |
| missing                                                            | 181 (34) <sup>g</sup> | 2 (2)          |                      | 5 (2)          |                      | 1 (0)          |                      | 1 (0)          |                      | 6 (2)          |                      |
|                                                                    | <b>GM ± SD</b>        | <b>GM ± SD</b> | <b>p<sup>f</sup></b> |
| Dialkylphosphate urinary metabolites during pregnancy <sup>c</sup> |                       |                |                      |                |                      |                |                      |                |                      |                |                      |
| ∑DAPs (nmol/L)                                                     | 136.5 ± 3.0           | 130.9 ± 2.7    | 0.24                 | 128.5 ± 2.7    | 0.18                 | 125.5 ± 2.7    | 0.03                 | 124.6 ± 2.7    | 0.01                 | 126.8 ± 2.8    | 0.04                 |
| ∑DMs (nmol/L)                                                      | 100.0 ± 3.4           | 96.1 ± 3.1     | 0.32                 | 94.7 ± 3.1     | 0.29                 | 92.4 ± 3.1     | 0.06                 | 90.8 ± 3.0     | 0.03                 | 93.3 ± 3.1     | 0.10                 |
| ∑DEs (nmol/L)                                                      | 21.3 ± 2.9            | 20.1 ± 3.0     | 0.11                 | 19.4 ± 3.0     | 0.04                 | 19.3 ± 3.0     | <0.01                | 19.1 ± 3.0     | <0.01                | 19.5 ± 3.0     | 0.02                 |



## WEB MATERIAL

Serum concentration during pregnancy<sup>d</sup>

|                                                   |                    |                       |      |                       |      |                       |      |                       |      |                       |      |
|---------------------------------------------------|--------------------|-----------------------|------|-----------------------|------|-----------------------|------|-----------------------|------|-----------------------|------|
| $\Sigma$ PBDEs<br>(47,99,100,153)<br>(ng/g lipid) | 26.2 ± 2.5 (n=468) | 25.9 ± 2.5<br>(n=321) | 0.67 | 25.2 ± 2.5<br>(n=262) | 0.28 | 26.0 ± 2.5<br>(n=310) | 0.81 | 25.7 ± 2.4<br>(n=297) | 0.56 | 25.7 ± 2.4<br>(n=314) | 0.51 |
| DDT (ng/g lipid)                                  | 22.2 ± 5.3 (n=470) | 22.6 ± 5.2<br>(n=323) | 0.74 | 24.3 ± 5.4<br>(n=263) | 0.18 | 23.2 ± 5.4<br>(n=313) | 0.40 | 23.3 ± 5.5<br>(n=299) | 0.40 | 23.7 ± 5.6<br>(n=317) | 0.21 |

Abbreviations: CHAMACOS, Center for the Health Assessment of Mothers and Children of Salinas; DDT, dichlorodiphenyltrichloroethane; DAP, dialkyl phosphate; GM, geometric mean; PPVT, Peabody Picture Vocabulary Test; PBDE, polybrominated diphenyl ether; SD, standard deviation.

<sup>a</sup> Some analyses include fewer observations based on lower levels of participation in a specific outcome assessment.

<sup>b</sup> Some percentages do not sum to 100 due to rounding.

<sup>c</sup> Urinary metabolite concentrations based on the unadjusted average concentration in two pregnancy urine samples.

<sup>d</sup> Measured in prenatal or delivery blood samples for ~83%; back-extrapolated from maternal serum concentrations at child age 9 years for ~17%. See Methods for details.

<sup>e</sup> Statistical significance based on chi-square analysis comparing children with prenatal DAPs and non-missing values on the descriptive variable who were included in versus excluded from this analysis. Reasons for exclusion were twin status (n=6), birth defect affecting neurodevelopment or test validity (n=3), or autism diagnosis (n=3), and loss-to-follow-up, failure to complete visit, or teacher declining to participate for all others.

<sup>f</sup> Statistical significance based on t-test of log-transformed values (not GM as shown) for children included versus excluded from this analysis.

<sup>g</sup> Because these variables were assessed at 7y and/or 9y visits, they are missing for the sizable minority of families who were lost to follow-up before this point.

## WEB MATERIAL

**Web Table 2.** Mean attention and executive function scores by age point, based on teacher report, maternal report, and child assessment: CHAMACOS study.

| Outcome                                                                          | orientation <sup>a</sup> | Age 7 Years    |                 | Age 9 Years        | Age 10.5 Years     | Age 12 Years          |                     |
|----------------------------------------------------------------------------------|--------------------------|----------------|-----------------|--------------------|--------------------|-----------------------|---------------------|
|                                                                                  |                          | Mean ± SD      | Mean ± SD       | Mean ± SD          | Mean ± SD          | Mean ± SD             |                     |
| <b>Behavioral Rating Scale</b>                                                   |                          |                |                 |                    |                    |                       |                     |
|                                                                                  |                          | Teacher report | Maternal report | Maternal report    | Maternal report    | Maternal report       |                     |
| Behavior Rating Inventory of Executive Function ( <i>T</i> -scores) <sup>b</sup> |                          |                |                 |                    |                    |                       |                     |
| Behavior Regulation Index                                                        | higher                   | 50 ± 9         | 50 ± 10         | 51 ± 11            |                    | 51 ± 11               |                     |
| Metacognition Index                                                              | higher                   | 52 ± 10        | 50 ± 11         | 49 ± 10            |                    | 48 ± 9                |                     |
| Global Executive Composite                                                       | higher                   | 51 ± 10        | 50 ± 11         | 50 ± 10            |                    | 49 ± 10               |                     |
| Conners ADHD/DSM-IV Scales ( <i>T</i> -scores) <sup>b</sup>                      |                          |                |                 |                    |                    |                       |                     |
| ADHD Index                                                                       | higher                   | 53 ± 11        | 50 ± 8          | 52 ± 9             |                    | 50 ± 8                |                     |
| DSM-IV total scale                                                               | higher                   | 52 ± 10        | 50 ± 8          | 52 ± 10            |                    | 50 ± 8                |                     |
| Inattentive subscale                                                             | higher                   | 48 ± 9         | 49 ± 8          | 50 ± 9.0           |                    | 48 ± 7                |                     |
| Hyperactive/Impulsive subscale                                                   | higher                   | 52 ± 10        | 52 ± 8          | 54 ± 11            |                    | 52 ± 9                |                     |
| Behavior Assessment System for Children-2 ( <i>T</i> -scores) <sup>b</sup>       |                          |                |                 |                    |                    |                       |                     |
| Hyperactivity scale                                                              | higher                   | 50 ± 10        | 46 ± 9          |                    | 47 ± 8             |                       |                     |
| Attention Problems scale                                                         | higher                   | 51 ± 8         | 50 ± 10         |                    | 49 ± 10            |                       |                     |
|                                                                                  |                          |                |                 | <b>Age 7 Years</b> | <b>Age 9 Years</b> | <b>Age 10.5 Years</b> | <b>Age 12 Years</b> |
|                                                                                  |                          |                |                 | Mean ± SD          | Mean ± SD          | Mean ± SD             | Mean ± SD           |
| <b>Child Assessment</b>                                                          |                          |                |                 |                    |                    |                       |                     |
| Wechsler Intelligence Scales for Children (standardized scores) <sup>b</sup>     |                          |                |                 |                    |                    |                       |                     |
| Processing Speed Index                                                           | lower                    |                | 109 ± 13        |                    | 98 ± 12            |                       |                     |
| Working Memory Index                                                             | lower                    |                | 100 ± 14        |                    | 91 ± 12            |                       |                     |
| Wisconsin Card Sort Test ( <i>T</i> -scores) <sup>b</sup>                        |                          |                |                 |                    |                    |                       |                     |
| Errors                                                                           | lower                    |                |                 | 48 ± 11            |                    | 54 ± 11               |                     |
| Perseverative errors                                                             | lower                    |                |                 | 52 ± 14            |                    | 57 ± 14               |                     |
| Conners' Continuous Performance Test II ( <i>T</i> -scores) <sup>b</sup>         |                          |                |                 |                    |                    |                       |                     |
| Errors of omission                                                               | higher                   |                |                 | 59 ± 17            |                    | 49 ± 9                |                     |
| Errors of commission                                                             | higher                   |                |                 | 50 ± 9             |                    | 49 ± 11               |                     |
| Hit rate standard error overall                                                  | higher                   |                |                 | 58 ± 11            |                    | 48 ± 9                |                     |
| Hit rate standard error by block                                                 | higher                   |                |                 | 51 ± 12            |                    | 50 ± 10               |                     |

## WEB MATERIAL

|                                                    |        |         |         |
|----------------------------------------------------|--------|---------|---------|
| Hit rate standard error by inter-stimulus interval | higher | 58 ± 10 | 50 ± 10 |
| ADHD Confidence Index <sup>c</sup>                 | higher | 55 ± 22 | 47 ± 17 |

---

Abbreviations: ADHD, attention-deficit/hyperactivity disorder; CHAMACOS, Center for the Health Assessment of Mothers and Children of Salinas; DSM-IV, Diagnostic and Statistical Manual of Mental Disorders, Fourth Edition; SD, standard deviation.

<sup>a</sup> higher scores indicate more symptomatic behavior/poorer performance; lower scores indicate poorer performance.

<sup>b</sup> Behavior Rating Inventory of Executive Function, Conners' ADHD/ Diagnostic and Statistical Manual of Mental Disorders Scales, Behavior Assessment System for Children, Wisconsin Card Sort Task, and Conners' Continuous Performance Test T-scores are standardized to mean ± SD = 50 ± 10; Wechsler Intelligence Scale for Children T-standardized scores are standardized to mean ± SD = 100 ± 15.

<sup>c</sup> The Conners' Continuous Performance Test ADHD Confidence Index is not a T-score, but is rather produced by discriminant function analysis and represents the percentage of children with this performance profile who would be correctly classified as having ADHD.

## WEB MATERIAL

**Web Table 3: Spearman Correlation of Select Measures within Timepoints: CHAMACOS Study**

| <b>Age 7y Measures:</b>                          | <i>M-GEC</i>    | <i>M-CADS</i>    | <i>M-BASC-H</i> | <i>M-BASC-AP</i> | <i>T-GEC</i>   | <i>T-CADS</i>  | <i>T-BASC-H</i> | <i>T-BASC-AP</i> | <i>WISC-PS</i> |
|--------------------------------------------------|-----------------|------------------|-----------------|------------------|----------------|----------------|-----------------|------------------|----------------|
| Mat: BRIEF Global Executive Composite (M-GEC):   | 1.0000          |                  |                 |                  |                |                |                 |                  |                |
| Mat: CADS ADHD Index (M-CADS):                   | 0.7695*         | 1.0000           |                 |                  |                |                |                 |                  |                |
| Mat: BASC Hyperactivity (M-BASC-H):              | 0.7013*         | 0.6100*          | 1.0000          |                  |                |                |                 |                  |                |
| Mat: BASC Attention Problems (M-BASC-AP):        | 0.5783*         | 0.6308*          | 0.4626*         | 1.0000           |                |                |                 |                  |                |
| Teach: BRIEF Global Executive Composite (T-GEC): | 0.1952*         | 0.3030*          | 0.0876          | 0.2380*          | 1.0000         |                |                 |                  |                |
| Teach: CADS ADHD Index (T-CADS):                 | 0.1642*         | 0.2640*          | 0.1197          | 0.2169*          | 0.8607*        | 1.0000         |                 |                  |                |
| Teach: BASC-2 Hyperactivity (T-BASC-H):          | 0.1012          | 0.1837*          | 0.1740*         | 0.2057*          | 0.7319*        | 0.7664*        | 1.0000          |                  |                |
| Teach: BASC-2 Attention Problems (T-BASC-AP):    | 0.1772*         | 0.1955*          | 0.1254          | 0.2091*          | 0.7829*        | 0.8302*        | 0.7045*         | 1.0000           |                |
| Assess: WISC-IV Processing Speed (WISC-PS):      | -0.1181         | -0.0960          | -0.0262         | -0.0722          | -0.2035*       | -0.1688*       | -0.1607         | -0.1850*         | 1.0000         |
| Assess: WISC-IV Working Memory (WISC-WM):        | -0.1235         | -0.1787*         | -0.0470         | -0.2344*         | -0.2539*       | -0.2173*       | -0.1614         | -0.3275*         | 0.3003*        |
| <b>Age 9y Measures:</b>                          | <i>M-GEC</i>    | <i>M-CADS</i>    | <i>WCST-E</i>   | <i>WCST-PE</i>   | <i>CPT</i>     |                |                 |                  |                |
| Mat: BRIEF Global Executive Composite (M-GEC):   | 1.0000          |                  |                 |                  |                |                |                 |                  |                |
| Mat: CADS ADHD Index (M-CADS):                   | 0.8255*         | 1.0000           |                 |                  |                |                |                 |                  |                |
| Assess: WCST Errors (WCST-E)                     | -0.1742*        | -0.2211*         | 1.0000          |                  |                |                |                 |                  |                |
| Assess: WCST Perseverative errors (WCST-PE):     | -0.1421         | -0.1613*         | 0.7163*         | 1.0000           |                |                |                 |                  |                |
| Assess: CPT-II ADHD Confidence Index (CPT):      | 0.1686*         | 0.1352           | -0.1276         | -0.0665          | 1.0000         |                |                 |                  |                |
| <b>Age 10.5y Measures:</b>                       | <i>M-BASC-H</i> | <i>M-BASC-AP</i> | <i>C-BASC-H</i> | <i>C-BASC-AP</i> | <i>WISC-PS</i> | <i>WISC-WM</i> |                 |                  |                |
| Mat: BASC-2 Hyperactivity (M-BASC-H):            | 1.0000          |                  |                 |                  |                |                |                 |                  |                |
| Mat: BASC-2 Attention Problems (M-BASC-AP):      | 0.5250*         | 1.0000           |                 |                  |                |                |                 |                  |                |
| Child: BASC-2 Hyperactivity (C-BASC-H):          | 0.2075*         | 0.2757*          | 1.0000          |                  |                |                |                 |                  |                |
| Child: BASC-2 Attention Problems (C-BASC-AP):    | 0.1764*         | 0.2926*          | 0.6955*         | 1.0000           |                |                |                 |                  |                |
| Assess: WISC-IV Processing Speed (WISC-PS):      | -0.0340         | -0.1751*         | -0.2006*        | -0.1563*         | 1.0000         |                |                 |                  |                |
| Assess: WISC-IV Working Memory (WISC-WM):        | -0.1345         | -0.2671*         | -0.0921         | -0.1904*         | 0.2135*        | 1.0000         |                 |                  |                |
| <b>Age 12y Measures:</b>                         | <i>M-GEC</i>    | <i>M-CADS</i>    | <i>WCST-E</i>   | <i>WCST-PE</i>   | <i>CPT</i>     |                |                 |                  |                |
| Mat: BRIEF Global Executive Composite (M-GEC):   | 1.0000          |                  |                 |                  |                |                |                 |                  |                |
| Mat: CADS ADHD Index (M-CADS):                   | 0.8150*         | 1.000            |                 |                  |                |                |                 |                  |                |
| Assess: WCST Errors (WCST-E)                     | -0.0413         | -0.0945          | 1.000           |                  |                |                |                 |                  |                |
| Assess: WCST Perseverative errors (WCST-PE):     | -0.0805         | -0.1115          | 0.7851*         | 1.0000           |                |                |                 |                  |                |
| Assess: CPT-II ADHD Confidence Index (CPT):      | 0.0535          | 0.0420           | -0.0804         | -0.1043          | 1.0000         |                |                 |                  |                |

Abbreviations: ADHD, attention-deficit/hyperactivity disorder; Assess, direct assessment of child; BASC-2, Behavior Assessment System for Children-2; BRIEF, Behavior Rating Inventory of Executive Function; CADS, Child, child self-report; Conners ADHD/DSM-IV Scales; CHAMACOS, Center for the Health Assessment of Mothers and Children of Salinas; CPT-II, Conners' Continuous Performance Test II; DSM-IV, Diagnostic and Statistical Manual of Mental Disorders, Fourth Edition; Mat, maternal report; SD, standard deviation; WISC-IV, Teach, teacher report; Weschler Intelligence Scales for Children; WCST, Wisconsin Card Sort Test.

Shaded cells indicate that the scores being compared were from the same source (i.e., were all reported by the mother, teacher, child, or through direct assessment of the child).

\*Indicates Spearman correlations that are statistically significant at  $p < 0.01$ .

## WEB MATERIAL

**Web Table 4:** Spearman Correlation of Repeated Measures across Timepoints: CHAMACOS Study

| <b>Maternal Reports:</b>             |       |         |         |        |
|--------------------------------------|-------|---------|---------|--------|
| BRIEF Global Executive Composite at: |       | zy      | 9y      | 12y    |
|                                      | 7y    | 1.0000  |         |        |
|                                      | 9y    | 0.6856* | 1.0000  |        |
|                                      | 12y   | 0.5856* | 0.6617* | 1.0000 |
| CADS ADHD Index at:                  |       | 7y      | 9y      | 12y    |
|                                      | 7y    | 1.0000  |         |        |
|                                      | 9y    | 0.6782* | 1.0000  |        |
|                                      | 12y   | 0.5457* | 0.6398* | 1.0000 |
| BASC-2 Hyperactivity at:             |       | 7y      | 10.5y   |        |
|                                      | 7y    | 1.0000  |         |        |
|                                      | 10.5y | 0.5383* | 1.0000  |        |
| BASC-2 Attention Problems at:        |       | 7y      | 10.5y   |        |
|                                      | 7y    | 1.0000  |         |        |
|                                      | 10.5y | 0.5816* | 1.0000  |        |
| <b>Child Assessments:</b>            |       |         |         |        |
| WISC-IV Processing Speed at:         |       | 7y      | 10.5y   |        |
|                                      | 7y    | 1.0000  |         |        |
|                                      | 10.5y | 0.4348* | 1.0000  |        |
| WISC-IV Working Memory at:           |       | 7y      | 10.5y   |        |
|                                      | 7y    | 1.0000  |         |        |
|                                      | 10.5y | 0.5122* | 1.0000  |        |
| WCST Errors at:                      |       | 9y      | 12y     |        |
|                                      | 9y    | 1.0000  |         |        |
|                                      | 12y   | 0.2122* | 1.0000  |        |
| WCST Perseverative errors at:        |       | 9y      | 12y     |        |
|                                      | 9y    | 1.0000  |         |        |
|                                      | 12y   | 0.1702* | 1.0000  |        |
| CPT-II ADHD Confidence Index at:     |       | 9y      | 12y     |        |
|                                      | 9y    | 1.0000  |         |        |
|                                      | 12y   | 0.3819* | 1.0000  |        |

Abbreviations: ADHD, attention-deficit/hyperactivity disorder; Assess, direct assessment of child; BASC-2, Behavior Assessment System for Children-2; BRIEF, Behavior Rating Inventory of Executive Function; CADS, Child, child self-report; Conners ADHD/DSM-IV Scales; CHAMACOS, Center for the Health Assessment of Mothers and Children of Salinas; CPT-II, Conners' Continuous Performance Test II; DSM-IV, Diagnostic and Statistical Manual of Mental Disorders, Fourth Edition; Mat, maternal report; SD, standard deviation; WISC-IV, Teach, teacher report; Weschler Intelligence Scales for Children; WCST, Wisconsin Card Sort Test, y, year.

\*Indicates Spearman correlations that are statistically significant at  $p < 0.01$ .

## WEB MATERIAL

**Supplemental Table 5:** Spearman Correlation Matrix of Measures, with Repeated Measures Represented as the Mean Score for that Child Across Age Points: CHAMACOS Study

| Measures: <sup>a</sup>                                             | $\rho^a$ | M-GEC <sub>m</sub> | M-CADS <sub>m</sub> | M-BASC-<br>H <sub>m</sub> | M-BASC-<br>A <sub>pm</sub> | T-GEC7   | T-CADS7  | T-BASC-<br>H7 | T-BASC-<br>AP7 | C-BASC-<br>H10 | C-BASC-<br>AP10 | WISC-<br>PS <sub>m</sub> | WISC-<br>WM <sub>m</sub> | WCST-<br>Em | CPT <sub>m</sub> |
|--------------------------------------------------------------------|----------|--------------------|---------------------|---------------------------|----------------------------|----------|----------|---------------|----------------|----------------|-----------------|--------------------------|--------------------------|-------------|------------------|
| Mat: BRIEF Global Executive Composite, mean (M-GEC <sub>m</sub> ): | (+)      | 1.0000             |                     |                           |                            |          |          |               |                |                |                 |                          |                          |             |                  |
| Mat: CADS ADHD Index, mean (M-CADS <sub>m</sub> ):                 | (+)      | 0.8636*            | 1.0000              |                           |                            |          |          |               |                |                |                 |                          |                          |             |                  |
| Mat: BASC Hyperactivity, mean (M-BASC-H <sub>m</sub> ):            | (+)      | 0.7203*            | 0.6101*             | 1.0000                    |                            |          |          |               |                |                |                 |                          |                          |             |                  |
| Mat: BASC Attention Problems, mean (M-BASC-AP <sub>m</sub> ):      | (+)      | 0.6830*            | 0.6946*             | 0.5721*                   | 1.0000                     |          |          |               |                |                |                 |                          |                          |             |                  |
| Teach: BRIEF Global Executive Composite, 7y (T-GEC7):              | (+)      | 0.1983*            | 0.2961*             | 0.1095                    | 0.2548*                    | 1.0000   |          |               |                |                |                 |                          |                          |             |                  |
| Teach: CADS ADHD Index, 7y (T-CADS7):                              | (+)      | 0.1855*            | 0.2631*             | 0.1487                    | 0.2436*                    | 0.8607*  | 1.0000   |               |                |                |                 |                          |                          |             |                  |
| Teach: BASC-2 Hyperactivity, 7y (T-BASC-H7):                       | (+)      | 0.1549             | 0.2018*             | 0.2125*                   | 0.2461*                    | 0.7319*  | 0.7664*  | 1.0000        |                |                |                 |                          |                          |             |                  |
| Teach: BASC-2 Attention Problems, 7y (T-BASC-AP7):                 | (+)      | 0.2013*            | 0.1997*             | 0.1471                    | 0.2723*                    | 0.7829*  | 0.8302*  | 0.7045*       | 1.0000         |                |                 |                          |                          |             |                  |
| Child: BASC-2 Hyperactivity, 10.5y (C-BASC-H10):                   | (+)      | 0.2088*            | 0.2159*             | 0.1942*                   | 0.2660*                    | 0.2086*  | 0.2024*  | 0.1949*       | 0.2028*        | 1.0000         |                 |                          |                          |             |                  |
| Child: BASC-2 Attention Problems, 10.5y (C-BASC-AP10):             | (+)      | 0.1849*            | 0.2053*             | 0.1621*                   | 0.2756*                    | 0.2571*  | 0.2263*  | 0.2578*       | 0.2664*        | 0.6955*        | 1.0000          |                          |                          |             |                  |
| Assess: WISC-IV Processing Speed, mean (WISC-PS <sub>m</sub> ):    | (-)      | -0.1268            | -0.1048             | -0.0088                   | -0.1661*                   | -0.1812* | -0.1532  | -0.1327       | -0.2196*       | -0.1947*       | -0.1707*        | 1.0000                   |                          |             |                  |
| Assess: WISC-IV Working Memory, mean (WISC-WM <sub>m</sub> ):      | (-)      | -0.2453*           | -0.2560*            | -0.1249                   | -0.2957*                   | -0.2660* | -0.2182* | -0.1273       | -0.3205*       | -0.0973        | -0.2151*        | 0.2992*                  | 1.0000                   |             |                  |
| Assess: WCST Errors, mean (WCST-Em)                                | (-)      | -0.1614*           | -0.2391*            | -0.0184                   | -0.1785*                   | -0.1912* | -0.1802* | -0.1307       | -0.1668*       | -0.1091        | -0.1418         | 0.1957*                  | 0.2742*                  | 1.0000      |                  |
| Assess: CPT-II ADHD Confidence Index, mean (CPT <sub>m</sub> ):    | (+)      | 0.1860*            | 0.1790*             | 0.2018*                   | 0.2589*                    | 0.1695*  | 0.1617*  | 0.1940*       | 0.1851*        | 0.1083         | 0.1179          | -0.2204*                 | -0.2019*                 | -0.1844*    | 1.0000           |

Abbreviations: ADHD, attention-deficit/hyperactivity disorder; Assess, direct assessment of child; BASC-2, Behavior Assessment System for Children-2; BRIEF, Behavior Rating Inventory of Executive Function; CADS, Child, child self-report; Conners ADHD/DSM-IV Scales; CHAMACOS, Center for the Health Assessment of Mothers and Children of Salinas; CPT-II, Conners' Continuous Performance Test II; DSM-IV, Diagnostic and Statistical Manual of Mental Disorders, Fourth Edition; Mat, maternal report; SD, standard deviation; WISC-IV, Teach, teacher report; Weschler Intelligence Scales for Children; WCST, Wisconsin Card Sort Test. Shaded cells indicate that the scores being compared were from the same source (i.e., were all reported by the mother, by the teacher, by the child, or through direct assessment of the child).

<sup>a</sup>Indicates Spearman correlations that are statistically significant at  $p < 0.01$ .

<sup>a</sup>(+) higher scores indicate more symptomatic behavior; (-) lower scores indicate poorer performance.

## WEB MATERIAL

**Web Table 6.** Change in maternal report and child-assessed attention and executive function scores per 10-fold increases in mean total prenatal urinary DM concentrations (nmol/L) using repeated measures (GEE) models, overall and stratified by sex, in the CHAMACOS study population, enrolled 1999-2000 in Salinas Valley, California.

| Outcome                                                                          | orientation <sup>a</sup> | age (yrs) at assessment | Overall |         |         |             | Boys |         |         |             | Girls |         |         |             | <i>p</i> -value interaction |
|----------------------------------------------------------------------------------|--------------------------|-------------------------|---------|---------|---------|-------------|------|---------|---------|-------------|-------|---------|---------|-------------|-----------------------------|
|                                                                                  |                          |                         | No.     | No. obs | $\beta$ | (95% CI)    | No.  | No. obs | $\beta$ | (95% CI)    | No.   | No. obs | $\beta$ | (95% CI)    |                             |
| <b>Maternal Report<sup>b,c</sup></b>                                             |                          |                         |         |         |         |             |      |         |         |             |       |         |         |             |                             |
| Behavior Rating Inventory of Executive Function ( <i>T</i> -scores) <sup>d</sup> |                          | 7, 9, 12                |         |         |         |             |      |         |         |             |       |         |         |             |                             |
| Behavior Regulation Index                                                        | higher                   |                         | 347     | 978     | 3.1     | (1.5,4.8)   | 163  | 460     | 5.0     | (2.6,7.4)   | 184   | 518     | 1.9     | (-0.1,4.0)  | 0.10                        |
| Metacognition Index                                                              | higher                   |                         | 347     | 978     | 3.4     | (2.5,5.0)   | 163  | 460     | 4.6     | (2.5,6.8)   | 184   | 518     | 2.6     | (0.5,4.8)   | 0.23                        |
| Global Executive Composite                                                       | higher                   |                         | 347     | 978     | 3.5     | (2.9,5.2)   | 163  | 460     | 5.2     | (2.9,7.5)   | 184   | 518     | 2.5     | (0.3,4.6)   | 0.13                        |
| Conners ADHD/DSM-IV Scales ( <i>T</i> -scores) <sup>d</sup>                      |                          | 7, 9, 12                |         |         |         |             |      |         |         |             |       |         |         |             |                             |
| ADHD Index                                                                       | higher                   |                         | 349     | 988     | 1.7     | (0.4,3.0)   | 163  | 464     | 1.5     | (-0.3,3.3)  | 186   | 524     | 2.0     | (0.2,3.8)   | 0.63                        |
| DSM-IV total scale                                                               | higher                   |                         | 349     | 988     | 1.7     | (0.3,3.1)   | 163  | 464     | 2.1     | (0.2,3.9)   | 186   | 524     | 1.6     | (-0.4,3.7)  | 0.82                        |
| Inattentive                                                                      | higher                   |                         | 349     | 988     | 1.6     | (0.4,2.9)   | 163  | 464     | 2.0     | (0.3,3.6)   | 186   | 524     | 1.5     | (-0.2,3.3)  | 0.81                        |
| Hyperactive/Impulsive                                                            | higher                   |                         | 349     | 988     | 1.6     | (0.1,3.1)   | 163  | 464     | 1.9     | (-0.1,4.0)  | 186   | 524     | 1.4     | (-0.7,3.5)  | 0.74                        |
| Behavior Assessment System for Children-2 ( <i>T</i> -scores) <sup>d</sup>       |                          | 7, 10.5                 |         |         |         |             |      |         |         |             |       |         |         |             |                             |
| Hyperactivity                                                                    | higher                   |                         | 335     | 634     | 1.5     | (0.2,2.8)   | 157  | 294     | 2.5     | (0.4,4.6)   | 178   | 340     | 0.9     | (-0.6,2.4)  | 0.40                        |
| Attention Problems                                                               | higher                   |                         | 335     | 634     | 2.5     | (0.8,4.2)   | 157  | 294     | 1.8     | (-0.6,4.2)  | 178   | 340     | 2.9     | (0.5,5.2)   | 0.52                        |
| <b>Child Assessment<sup>b,e</sup></b>                                            |                          |                         |         |         |         |             |      |         |         |             |       |         |         |             |                             |
| Weschler Intelligence Scales for Children (standardized scores) <sup>d</sup>     |                          | 7, 10.5                 |         |         |         |             |      |         |         |             |       |         |         |             |                             |
| Processing Speed Index                                                           | lower                    |                         | 334     | 605     | -0.8    | (-3.0,1.3)  | 157  | 283     | -1.5    | (-5.2,1.1)  | 177   | 322     | 0.1     | (-2.4,2.7)  | 0.32                        |
| Working Memory Index                                                             | lower                    |                         | 334     | 605     | -3.5    | (-6.2,-1.4) | 157  | 283     | -4.6    | (-8.1,-1.0) | 177   | 322     | -2.2    | (-5.0,0.5)  | 0.43                        |
| Wisconsin Card Sort Test ( <i>T</i> -scores) <sup>d</sup>                        |                          | 9, 12                   |         |         |         |             |      |         |         |             |       |         |         |             |                             |
| Errors                                                                           | lower                    |                         | 325     | 630     | -2.7    | (-4.5,-1.0) | 153  | 295     | -1.3    | (-3.9,1.3)  | 172   | 335     | -3.3    | (-5.5,-1.1) | 0.36                        |
| Perseverative errors                                                             | lower                    |                         | 325     | 630     | -2.8    | (-5.1,-0.5) | 153  | 295     | -1.7    | (-5.3,1.9)  | 172   | 335     | -3.2    | (-6.2,-0.2) | 0.68                        |
| Conners' Continuous Performance Test II ( <i>T</i> -scores) <sup>d</sup>         |                          | 9, 12                   |         |         |         |             |      |         |         |             |       |         |         |             |                             |
| Errors of omission                                                               | higher                   |                         | 325     | 634     | 1.6     | (-0.3,3.6)  | 153  | 297     | 2.1     | (-0.9,5.6)  | 172   | 338     | 0.8     | (-1.8,3.4)  | 0.19                        |
| Errors of commission                                                             | higher                   |                         | 325     | 634     | 1.4     | (-0.3,3.0)  | 153  | 297     | -0.6    | (-3.4,3.0)  | 172   | 338     | 3.2     | (1.1,5.3)   | 0.01                        |
| Hit rate standard error overall                                                  | higher                   |                         | 325     | 634     | 1.2     | (-0.2,2.9)  | 153  | 297     | 1.1     | (-1.4,4.9)  | 172   | 338     | 1.3     | (-1.0,3.6)  | 0.75                        |

## WEB MATERIAL

|                                                    |        |     |     |     |            |     |     |     |            |     |     |      |            |      |
|----------------------------------------------------|--------|-----|-----|-----|------------|-----|-----|-----|------------|-----|-----|------|------------|------|
| Hit rate standard error by block                   | higher | 325 | 634 | 0.6 | (-1.3,2.5) | 153 | 297 | 0.7 | (-1.7,5.5) | 172 | 338 | 0.7  | (-2.2,3.6) | 0.74 |
| Hit rate standard error by inter-stimulus interval | higher | 325 | 634 | 2.2 | (0.6,3.8)  | 153 | 297 | 1.5 | (-0.5,4.8) | 172 | 338 | 3.1  | (0.8,5.3)  | 0.21 |
| ADHD Confidence Index <sup>f</sup>                 | higher | 325 | 634 | 0.5 | (-2.7,3.6) | 153 | 297 | 1.0 | (-3.7,5.8) | 172 | 338 | -0.4 | (-4.7,3.9) | 0.58 |

Abbreviations: ADHD, attention-deficit/hyperactivity disorder; CHAMACOS, Center for the Health Assessment of Mothers and Children of Salinas; CI, confidence interval; DM, dimethyl phosphate; DSM-IV, Diagnostic and Statistical Manual of Mental Disorders, Fourth Edition; GEE, generalized estimating equations.

<sup>a</sup> higher scores indicate more symptomatic behavior; lower scores indicate poorer performance.

<sup>b</sup> All models adjusted for maternal age, years in U.S., education, receptive language, and average depression score (7-9y); average HOME, Home Observation for the Measurement of the Environment score (7-12y); child age at assessment; and child sex.

<sup>c</sup> Parent report models additionally adjusted for language of questionnaire administration.

<sup>d</sup> Behavior Rating Inventory of Executive Function, Conners' ADHD/ Diagnostic and Statistical Manual of Mental Disorders Scales, Behavior Assessment System for Children, Wisconsin Card Sort Task, and Conners' Continuous Performance Test T-scores are standardized to mean  $\pm$  SD = 50  $\pm$  10; Wechsler Intelligence Scale for Children T-standardized scores are standardized to mean  $\pm$  SD = 100  $\pm$  15.

<sup>e</sup> Child testing models additionally adjusted for psychometrician who administered test, language of testing, and, for Conners' Continuous Performance Test and Wisconsin Card Sort Task models only, video game usage.

<sup>f</sup> The Conners' Continuous Performance Test ADHD Confidence Index is not a T-score but is rather produced by discriminant function analysis and represents the percentage of children with this performance profile who would be correctly classified as having ADHD.



## WEB MATERIAL

**Web Table 7.** Change in maternal report and child-assessed attention and executive function scores per 10-fold increases in mean total prenatal urinary DE concentrations (nmol/L) using repeated measures (GEE) models, overall and stratified by sex, in the CHAMACOS study population, enrolled 1999-2000 in Salinas Valley, California.

| Outcome                                                                          | orientation <sup>a</sup> | age (yrs) at assessment | Overall |         |         |             | Boys |         |         |             | Girls |         |         |             | <i>p</i> -value interaction |
|----------------------------------------------------------------------------------|--------------------------|-------------------------|---------|---------|---------|-------------|------|---------|---------|-------------|-------|---------|---------|-------------|-----------------------------|
|                                                                                  |                          |                         | No.     | No. obs | $\beta$ | (95% CI)    | No.  | No. obs | $\beta$ | (95% CI)    | No.   | No. obs | $\beta$ | (95% CI)    |                             |
| <b>Maternal Report<sup>b,c</sup></b>                                             |                          |                         |         |         |         |             |      |         |         |             |       |         |         |             |                             |
| Behavior Rating Inventory of Executive Function ( <i>T</i> -scores) <sup>d</sup> |                          | 7, 9, 12                |         |         |         |             |      |         |         |             |       |         |         |             |                             |
| Behavior Regulation Index                                                        | higher                   |                         | 347     | 978     | 1.1     | (-0.6,2.7)  | 163  | 460     | 1.4     | (-1.6,4.4)  | 184   | 518     | 0.7     | (-1.1,2.6)  | 0.73                        |
| Metacognition Index                                                              | higher                   |                         | 347     | 978     | 1.4     | (-0.4,3.1)  | 163  | 460     | 1.5     | (-1.6,4.5)  | 184   | 518     | 1.4     | (-0.5,3.4)  | 0.76                        |
| Global Executive Composite                                                       | higher                   |                         | 347     | 978     | 1.3     | (-0.4,3.0)  | 163  | 460     | 1.6     | (-1.5,4.6)  | 184   | 518     | 1.3     | (-0.7,3.2)  | 0.97                        |
| Conners ADHD/DSM-IV Scales ( <i>T</i> -scores) <sup>d</sup>                      |                          | 7, 9, 12                |         |         |         |             |      |         |         |             |       |         |         |             |                             |
| ADHD Index                                                                       | higher                   |                         | 349     | 988     | 1.3     | (0.1,2.6)   | 163  | 464     | 1.1     | (-1.0,3.2)  | 186   | 524     | 1.5     | (-0.1,3.1)  | 0.58                        |
| DSM-IV total scale                                                               | higher                   |                         | 349     | 988     | 0.2     | (-0.1,2.6)  | 163  | 464     | 1.2     | (-1.0,3.4)  | 186   | 524     | 1.2     | (-0.5,2.9)  | 0.94                        |
| Inattentive                                                                      | higher                   |                         | 349     | 988     | 1.1     | (-0.1,2.3)  | 163  | 464     | 1.2     | (-0.8,3.2)  | 186   | 524     | 1.2     | (-0.3,2.7)  | 0.84                        |
| Hyperactive/Impulsive                                                            | higher                   |                         | 349     | 988     | 1.1     | (-0.3,2.6)  | 163  | 464     | 1.3     | (-1.1,3.7)  | 186   | 524     | 0.9     | (-0.9,2.6)  | 0.76                        |
| Behavior Assessment System for Children-2 ( <i>T</i> -scores) <sup>d</sup>       |                          | 7, 10.5                 |         |         |         |             |      |         |         |             |       |         |         |             |                             |
| Hyperactivity                                                                    | higher                   |                         | 335     | 634     | 0.7     | (-0.6,4.2)  | 157  | 294     | 1.8     | (-0.6,4.2)  | 178   | 340     | -0.1    | (-1.5,1.3)  | 0.16                        |
| Attention Problems                                                               | higher                   |                         | 335     | 634     | 0.8     | (-2.1,3.8)  | 157  | 294     | 0.9     | (-2.1,3.8)  | 178   | 340     | 0.7     | (-1.8,3.1)  | 0.84                        |
| <b>Child Assessment<sup>b,e</sup></b>                                            |                          |                         |         |         |         |             |      |         |         |             |       |         |         |             |                             |
| Weschler Intelligence Scales for Children (standardized scores) <sup>d</sup>     |                          | 7, 10.5                 |         |         |         |             |      |         |         |             |       |         |         |             |                             |
| Processing Speed Index                                                           | lower                    |                         | 334     | 605     | -1.9    | (-4.4,0.6)  | 157  | 283     | -5.0    | (-8.9,-1.2) | 177   | 322     | 0.4     | (-2.8,3.6)  | 0.03                        |
| Working Memory Index                                                             | lower                    |                         | 334     | 605     | -0.7    | (-3.3,1.8)  | 157  | 283     | -3.1    | (-6.5,0.3)  | 177   | 322     | 1.3     | (-2.2,4.8)  | 0.18                        |
| Wisconsin Card Sort Test ( <i>T</i> -scores) <sup>d</sup>                        |                          | 9, 12                   |         |         |         |             |      |         |         |             |       |         |         |             |                             |
| Errors                                                                           | lower                    |                         | 325     | 630     | -3.3    | (-5.1,-1.5) | 153  | 295     | -3.1    | (-5.8,0.4)  | 172   | 335     | -2.6    | (-4.9,-0.3) | 0.98                        |
| Perseverative errors                                                             | lower                    |                         | 325     | 630     | -3.4    | (-5.8,-1.0) | 153  | 295     | -2.8    | (-6.3,0.8)  | 172   | 335     | -3.4    | (-6.6,-0.2) | 0.62                        |
| Conners' Continuous Performance Test II ( <i>T</i> -scores) <sup>d</sup>         |                          | 9, 12                   |         |         |         |             |      |         |         |             |       |         |         |             |                             |
| Errors of omission                                                               | higher                   |                         | 325     | 634     | 1.2     | (-1.0,3.5)  | 153  | 297     | 1.4     | (-2.0,4.9)  | 172   | 337     | 1.1     | (-1.9,4.2)  | 0.77                        |
| Errors of commission                                                             | higher                   |                         | 325     | 634     | 1.1     | (-0.7,2.9)  | 153  | 297     | 1.9     | (-1.1,4.8)  | 172   | 337     | 0.5     | (-1.7,2.8)  | 0.57                        |
| Hit rate standard error overall                                                  | higher                   |                         | 325     | 634     | 1.4     | (-0.6,3.3)  | 153  | 297     | 3.5     | (0.4,6.5)   | 172   | 337     | 0.1     | (-2.5,2.6)  | 0.12                        |

## WEB MATERIAL

|                                                    |        |     |     |     |            |     |     |     |            |     |     |      |            |       |
|----------------------------------------------------|--------|-----|-----|-----|------------|-----|-----|-----|------------|-----|-----|------|------------|-------|
| Hit rate standard error by block                   | higher | 325 | 634 | 1.4 | (-0.2,3.0) | 153 | 297 | 4.1 | (1.5,6.6)  | 172 | 337 | 0.1  | (-2.0,2.3) | 0.02  |
| Hit rate standard error by inter-stimulus interval | higher | 325 | 634 | 0.9 | (-0.7,2.5) | 153 | 297 | 3.9 | (1.2,6.5)  | 172 | 337 | -1.1 | (-3.1,1.1) | <0.01 |
| ADHD Confidence Index <sup>f</sup>                 | higher | 325 | 634 | 2.4 | (-1.3,6.2) | 153 | 297 | 4.1 | (-1.6,9.8) | 172 | 337 | 1.2  | (-3.9,6.2) | 0.40  |

Abbreviations: ADHD, attention-deficit/hyperactivity disorder; BASC-2, Behavior Assessment System for Children-2; BRIEF, Behavior Rating Inventory of Executive Function; CADS, Conners ADHD/DSM-IV Scales; CHAMACOS, Center for the Health Assessment of Mothers and Children of Salinas; CI, confidence interval; CPT-II, Conners' Continuous Performance Test II; DE, diethyl phosphate; DSM, Diagnostic and Statistical Manual of Mental Disorders; GEE, generalized estimating equations; HOME, Home Observation for the Measurement of the Environment; PPVT, Peabody Picture Vocabulary Test; WISC-IV, Wechsler Intelligence Scales for Children; WCST, Wisconsin Card Sort Test.

<sup>a</sup> higher scores indicate more symptomatic behavior; lower scores indicate poorer performance.

<sup>b</sup> All models adjusted for maternal age, years in U.S., education, receptive language, and average depression score (7-9y); average HOME score (7-12y); child age at assessment; and child sex.

<sup>c</sup> Parent report models additionally adjusted for language of questionnaire administration.

<sup>d</sup> Behavior Rating Inventory of Executive Function, Conners' ADHD/ Diagnostic and Statistical Manual of Mental Disorders Scales, Behavior Assessment System for Children, Wisconsin Card Sort Task, and Conners' Continuous Performance Test T-scores are standardized to mean  $\pm$  SD = 50  $\pm$  10; Wechsler Intelligence Scale for Children T-standardized scores are standardized to mean  $\pm$  SD = 100  $\pm$  15.

<sup>e</sup> Child testing models additionally adjusted for psychometrician who administered test, language of testing, and, for Conners' Continuous Performance Test and Wisconsin Card Sort Task models only, video game usage.

<sup>f</sup> The Conners' Continuous Performance Test ADHD Confidence Index is not a T-score but is rather produced by discriminant function analysis and represents the percentage of children with this performance profile who would be correctly classified as having ADHD.

## WEB MATERIAL

**Web Table 8.** Adjusted regression coefficients and 95% confidence intervals for multivariable linear regression models of association between mean total prenatal urinary DAP concentrations (nmol/L, log10 scale) and children's attention and executive function as reflected by teacher report, maternal report, and child assessment scores by time point per 10-fold increases in mean total prenatal urinary DAP concentrations (nmol/L), in the CHAMACOS study population, enrolled 1999-2000 in Salinas Valley, California.

| Outcome                                                                          | orientation <sup>a</sup> | Teacher Report |         |            |             |         |            | Maternal Report |         |             |                |         |             |              |         |            |
|----------------------------------------------------------------------------------|--------------------------|----------------|---------|------------|-------------|---------|------------|-----------------|---------|-------------|----------------|---------|-------------|--------------|---------|------------|
|                                                                                  |                          | Age 7 Years    |         |            | Age 7 Years |         |            | Age 9 Years     |         |             | Age 10.5 Years |         |             | Age 12 Years |         |            |
|                                                                                  |                          | No.            | $\beta$ | (95% CI)   | No.         | $\beta$ | (95% CI)   | No.             | $\beta$ | (95% CI)    | No.            | $\beta$ | (95% CI)    | No.          | $\beta$ | (95% CI)   |
| Behavioral Rating Scale <sup>b,c</sup>                                           |                          |                |         |            |             |         |            |                 |         |             |                |         |             |              |         |            |
| Behavior Rating Inventory of Executive Function ( <i>T</i> -scores) <sup>e</sup> |                          |                |         |            |             |         |            |                 |         |             |                |         |             |              |         |            |
| Behavior Regulation Index                                                        | higher                   | 276            | 0.2     | (-2.2,2.6) | 326         | 4.2     | (2.0,6.4)  | 325             | 3.7     | (1.4,6.0)   |                |         |             | 327          | 3.1     | (0.8,5.4)  |
| Metacognition Index                                                              | higher                   | 276            | 2.2     | (-0.4,4.7) | 326         | 4.2     | (1.8,6.5)  | 325             | 4.8     | (2.9,6.8)   |                |         |             | 327          | 3.4     | (1.3,5.5)  |
| Global Executive Composite                                                       | higher                   | 276            | 1.5     | (-0.9,4.0) | 326         | 4.4     | (2.1,6.7)  | 325             | 4.6     | (2.6,6.6)   |                |         |             | 327          | 3.7     | (1.4,5.9)  |
| Conners ADHD/DSM-IV Scales ( <i>T</i> -scores) <sup>e</sup>                      |                          |                |         |            |             |         |            |                 |         |             |                |         |             |              |         |            |
| ADHD Index                                                                       | higher                   | 275            | 2.9     | (0.3,5.6)  | 339         | 1.9     | (0.2,3.6)  | 324             | 3.4     | (1.5,5.4)   |                |         |             | 325          | 1.9     | (0.1,3.8)  |
| DSM-IV total scale                                                               | higher                   | 275            | 1.3     | (-1.0,3.7) | 339         | 2.1     | (0.3,3.9)  | 324             | 3.4     | (1.2,5.6)   |                |         |             | 325          | 1.4     | (-0.4,3.3) |
| Inattentive                                                                      | higher                   | 275            | 1.6     | (-0.6,3.7) | 339         | 2.1     | (0.5,3.8)  | 324             | 3.5     | (1.5,5.3)   |                |         |             | 325          | 1.3     | (-0.2,2.9) |
| Hyperactive/Impulsive                                                            | higher                   | 275            | 0.5     | (-1.9,3.0) | 339         | 1.7     | (-0.2,3.5) | 324             | 2.9     | (0.3,5.4)   |                |         |             | 325          | 1.4     | (-0.5,3.3) |
| Behavior Assessment System for Children-2 ( <i>T</i> -scores) <sup>e</sup>       |                          |                |         |            |             |         |            |                 |         |             |                |         |             |              |         |            |
| Hyperactivity scale                                                              | higher                   | 276            | 0.0     | (-2.4,2.4) | 325         | 1.8     | (0.1,3.5)  |                 |         |             | 309            | 2.0     | (0.3,3.8)   |              |         |            |
| Attention Problems scale                                                         | higher                   | 276            | 2.0     | (0.2,3.8)  | 325         | 2.0     | (-0.3,4.4) |                 |         |             | 309            | 4.2     | (1.9,6.5)   |              |         |            |
| Child Assessment <sup>b,d</sup>                                                  |                          |                |         |            |             |         |            |                 |         |             |                |         |             |              |         |            |
| Wechsler Intelligence Scales for Children (standardized scores) <sup>e</sup>     |                          |                |         |            |             |         |            |                 |         |             |                |         |             |              |         |            |
| Processing Speed Index                                                           | lower                    |                |         |            | 295         | -2.1    | (-5.2,1.0) |                 |         |             | 310            | -1.7    | (-4.6,1.2)  |              |         |            |
| Working Memory Index                                                             | lower                    |                |         |            | 295         | -2.8    | (-6.0,0.4) |                 |         |             | 310            | -4.9    | (-7.6,-2.2) |              |         |            |
| Wisconsin Card Sort Test ( <i>T</i> -scores) <sup>e</sup>                        |                          |                |         |            |             |         |            |                 |         |             |                |         |             |              |         |            |
| Errors                                                                           | lower                    |                |         |            |             |         |            | 315             | -4.4    | (-7.1,-1.8) |                |         |             | 315          | -2.7    | (-5.3,0.0) |
| Perseverative errors                                                             | lower                    |                |         |            |             |         |            | 315             | -5.0    | (-8.7,-1.4) |                |         |             | 315          | -2.5    | (-5.9,0.1) |
| Conners' Continuous Performance Test II ( <i>T</i> -scores) <sup>e</sup>         |                          |                |         |            |             |         |            |                 |         |             |                |         |             |              |         |            |
| Errors of omission                                                               | higher                   |                |         |            |             |         |            | 316             | 4.0     | (0.3,7.6)   |                |         |             | 319          | -0.2    | (-2.1,1.7) |
| Errors of commission                                                             | higher                   |                |         |            |             |         |            | 316             | 3.0     | (0.8,5.2)   |                |         |             | 319          | 0.2     | (-2.4,2.7) |
| Hit rate standard error overall                                                  | higher                   |                |         |            |             |         |            | 316             | 2.7     | (0.2,5.3)   |                |         |             | 319          | 0.3     | (-1.8,2.5) |
| Hit rate standard error by block                                                 | higher                   |                |         |            |             |         |            | 316             | 2.1     | (-0.7,5.0)  |                |         |             | 319          | 1.0     | (-1.7,3.6) |

## WEB MATERIAL

|                                                    |        |     |     |            |     |      |            |
|----------------------------------------------------|--------|-----|-----|------------|-----|------|------------|
| Hit rate standard error by inter-stimulus interval | higher | 316 | 3.7 | (1.3,6.0)  | 319 | 1.0  | (-1.3,3.3) |
| ADHD Confidence Index <sup>f</sup>                 | higher | 316 | 2.6 | (-2.7,7.9) | 319 | -0.2 | (-4.1,3.6) |

Abbreviations: ADHD, attention-deficit/hyperactivity disorder; CHAMACOS, Center for the Health Assessment of Mothers and Children of Salinas; CI, confidence interval; DAP, dialkyl phosphate; DSM, Diagnostic and Statistical Manual of Mental Disorders; HOME, Home Observation for the Measurement of the Environment.

<sup>a</sup> higher scores indicate more symptomatic behavior; lower scores indicate poorer performance.

<sup>b</sup> All models adjusted for maternal age, years in U.S., education, receptive language, and average depression score (7-9y); average HOME score (7-12y); child age at assessment; and child sex.

<sup>c</sup> Parent report models additionally adjusted for language of questionnaire administration.

<sup>d</sup> Behavior Rating Inventory of Executive Function, Conners' ADHD/ Diagnostic and Statistical Manual of Mental Disorders Scales, Behavior Assessment System for Children, Wisconsin Card Sort Task, and Conners' Continuous Performance Test T-scores are standardized to mean  $\pm$  SD = 50  $\pm$  10; Wechsler Intelligence Scale for Children T-standardized scores are standardized to mean  $\pm$  SD = 100  $\pm$  15.

<sup>e</sup> Child testing models additionally adjusted for psychometrician who administered test, language of testing, and, for Conners' Continuous Performance Test and Wisconsin Card Sort Task models only, video game usage.

<sup>f</sup> The Conners' Continuous Performance Test ADHD Confidence Index is not a T-score but is rather produced by discriminant function analysis and represents the percentage of children with this performance profile who would be correctly classified as having ADHD.

## WEB MATERIAL

Web Figure 1. Directed acyclic graph (DAG) for associations of prenatal organophosphate exposure and executive function and attention-deficit/hyperactivity disorder-related behaviors.

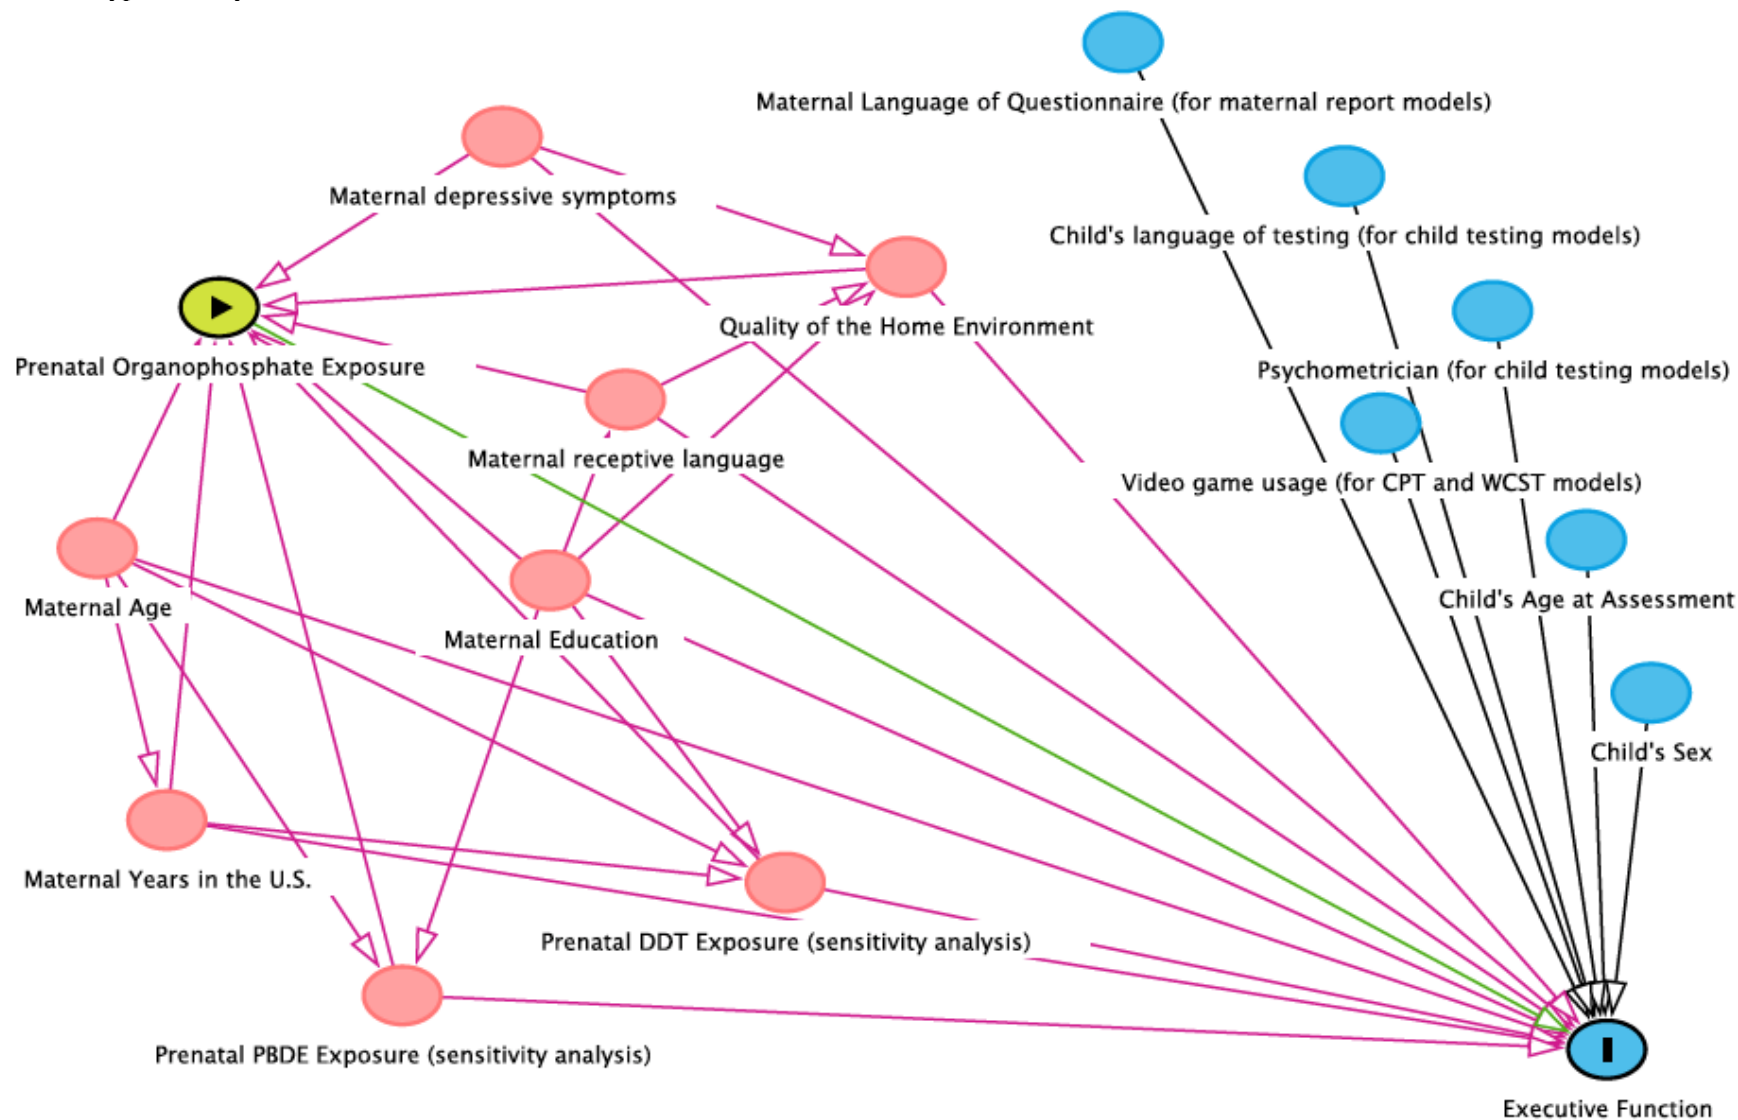

## WEB MATERIAL

### References

1. Gioia GA. Behavioral Rating Inventory of Executive Function (BRIEF). In. Lutz, FL: Psychological Assessment Resources, Inc.; 2000.
2. Conners CK. Conners' Rating Scales-Revised (CSR-R) Technical Manual (includes auxilliary scales: CADS-P and CADS-T). In. North Towanda, NY: Multi-Health Systems Inc.; 2001.
3. Reynolds CR, Kamphaus RW. BASC-2: Behavioral Assessment System for Children, Second Edition Manual. In. Circle Pines, MN: AGS Publishing; 2004.
4. Wechsler D. Wechsler Intelligence Scale for Children-Fourth Edition (WISC-IV) Administration and Scoring Manual. In. San Antonio, TX: Harcourt Assessment Incorporated; 2003.
5. Heaton RK. WCST-64: Computer Version for Windows - Research Edition. In. Odessa, FL: Psychological Assessment Resources, Inc.; 2000.
6. Conners CK, Staff M. Conners' Continuous Performance Test (CPT II). In. North Towanda, NY: Multi-Health Systems Inc.; 2000.
7. Epstein JN, Erkanli A, Conners CK, Klaric J, Costello JE, Angold A. Relations between Continuous Performance Test performance measures and ADHD behaviors. *Journal of abnormal child psychology*. 2003;31(5):543-554.
